# Supplementary material for: Binary Simplification as an Effective Tool in Metabolomics Data Analysis
Source: Metabolites. 2021 Nov 18;11(11):788. doi: 10.3390/metabo11110788 (PMC8621519; doi:10.3390/metabo11110788)
Supplement: Supplementary file 1 [file metabolites-11-00788-s001.zip]

Archive with 4 entries (4 files):
- supplementary_figures.pdf
- table S1.xlsx
- Table S2.xlsx
- Table S3.xlsx
