# Supplementary material for: Binary Simplification as an Effective Tool in Metabolomics Data Analysis
Source: Metabolites. 2021 Nov 18;11(11):788. doi: 10.3390/metabo11110788 (PMC8621519; doi:10.3390/metabo11110788)
Supplement: Supplementary file 1 [file metabolites-11-00788-s001.zip › table S1.xlsx]

## Sheet: Sheet1
Table S1	Effect of pre-treatments on clustering performance of HCA
	dataset	treatment	Discrimination Distance	% correct clusters	% correct 1st clustering
	GDg2-	1/2 min imputation P	0.0949136	45.4545	63.6364
	GDg2-	1/2 min imputation NP	0.124395	45.4545	63.6364
	GDg2-	1/2 min imputation NGP	0.138279	54.5455	78.7879
	GDg2-	RF imputation P	0.0404424	27.2727	57.5758
	GDg2-	RF imputation NP	0.0764759	18.1818	66.6667
	GDg2-	RF imputation NGP	0.0845375	18.1818	36.3636
	GDg2-	BinSim	0.154588	54.5455	66.6667
	GDg2+	1/2 min imputation P	0.0336821	27.2727	33.3333
	GDg2+	1/2 min imputation NP	0.0146732	27.2727	27.2727
	GDg2+	1/2 min imputation NGP	0.0250669	18.1818	48.4848
	GDg2+	RF imputation P	0.0153191	27.2727	39.3939
	GDg2+	RF imputation NP	0.00457939	18.1818	30.303
	GDg2+	RF imputation NGP	0.00364955	18.1818	30.303
	GDg2+	BinSim	0.0426177	45.4545	51.5152
	GDc2-	1/2 min imputation P	0.153994	63.6364	81.8182
	GDc2-	1/2 min imputation NP	0.164414	72.7273	90.9091
	GDc2-	1/2 min imputation NGP	0.262673	90.9091	96.9697
	GDc2-	RF imputation P	0.113977	45.4545	57.5758
	GDc2-	RF imputation NP	0.0814353	18.1818	66.6667
	GDc2-	RF imputation NGP	0.0835129	18.1818	42.4242
	GDc2-	BinSim	0.357932	100	100
	GDc2+	1/2 min imputation P	0.0536981	36.3636	78.7879
	GDc2+	1/2 min imputation NP	0.0213293	36.3636	54.5455
	GDc2+	1/2 min imputation NGP	0.0893307	81.8182	87.8788
	GDc2+	RF imputation P	0.00806623	27.2727	33.3333
	GDc2+	RF imputation NP	0.00438607	18.1818	30.303
	GDc2+	RF imputation NGP	0.00396295	18.1818	30.303
	GDc2+	BinSim	0.295619	100	100
	YD 2/15	1/2 min imputation P	0.305566	100	100
	YD 2/15	1/2 min imputation NP	0.224514	100	100
	YD 2/15	1/2 min imputation NGP	0.215139	100	100
	YD 2/15	RF imputation P	0.40306	100	100
	YD 2/15	RF imputation NP	0.282326	100	100
	YD 2/15	RF imputation NGP	0.305002	100	100
	YD 2/15	BinSim	0.144139	100	100
	YD 6/15	1/2 min imputation P	0.389163	100	100
	YD 6/15	1/2 min imputation NP	0.252549	100	100
	YD 6/15	1/2 min imputation NGP	0.239397	100	100
	YD 6/15	RF imputation P	0.431144	100	100
	YD 6/15	RF imputation NP	0.275365	100	100
	YD 6/15	RF imputation NGP	0.299972	100	100
	YD 6/15	BinSim	0.213596	100	100
