# Supplementary material for: Binary Simplification as an Effective Tool in Metabolomics Data Analysis
Source: Metabolites. 2021 Nov 18;11(11):788. doi: 10.3390/metabo11110788 (PMC8621519; doi:10.3390/metabo11110788)
Supplement: Supplementary file 1 [file metabolites-11-00788-s001.zip › Table S2.xlsx]

## Sheet: Sheet1
Table S2	Effect of pre-treatments on clustering performance of Kmeans
	dataset	treatment	Discrimination Distance	% correct clusters	Rand Index
	GDg2-	1/2 min imputation P	0.0847659	18.1818	0.523277
	GDg2-	1/2 min imputation NP	0.107849	22.7273	0.418734
	GDg2-	1/2 min imputation NGP	0.173118	36.3636	0.587762
	GDg2-	RF imputation P	0.036376	9.09091	0.39374
	GDg2-	RF imputation NP	0.00456143	4.54545	0.388493
	GDg2-	RF imputation NGP	0.0380681	9.09091	0.294763
	GDg2-	BinSim	0.159675	27.2727	0.530225
	GDg2+	1/2 min imputation P	0	0	0.215548
	GDg2+	1/2 min imputation NP	0.0410112	27.2727	0.506934
	GDg2+	1/2 min imputation NGP	0	0	0.298977
	GDg2+	RF imputation P	0	0	0.290241
	GDg2+	RF imputation NP	0.00939526	9.09091	0.410958
	GDg2+	RF imputation NGP	0	0	0.22048
	GDg2+	BinSim	0	0	0.232
	GDc2-	1/2 min imputation P	0.170711	36.3636	0.658703
	GDc2-	1/2 min imputation NP	0.174117	40.9091	0.680268
	GDc2-	1/2 min imputation NGP	0.346586	72.7273	0.838235
	GDc2-	RF imputation P	0.144482	36.3636	0.558268
	GDc2-	RF imputation NP	0.0104587	9.09091	0.413681
	GDc2-	RF imputation NGP	0.0373314	9.09091	0.286713
	GDc2-	BinSim	0.601371	100	1
	GDc2+	1/2 min imputation P	0	0	0.232
	GDc2+	1/2 min imputation NP	0.0422593	27.2727	0.503185
	GDc2+	1/2 min imputation NGP	0.0213048	9.09091	0.374504
	GDc2+	RF imputation P	0	0	0.290241
	GDc2+	RF imputation NP	0.00920625	9.09091	0.426752
	GDc2+	RF imputation NGP	0	0	0.206264
	GDc2+	BinSim	0.359684	72.7273	0.838235
	YD 2/15	1/2 min imputation P	0.728312	100	1
	YD 2/15	1/2 min imputation NP	0.392869	100	1
	YD 2/15	1/2 min imputation NGP	0.36542	100	1
	YD 2/15	RF imputation P	0.67974	100	1
	YD 2/15	RF imputation NP	0.296566	100	1
	YD 2/15	RF imputation NGP	0.256799	100	1
	YD 2/15	BinSim	0.863333	100	1
	YD 6/15	1/2 min imputation P	0.688023	100	1
	YD 6/15	1/2 min imputation NP	0.367734	100	1
	YD 6/15	1/2 min imputation NGP	0.434298	100	1
	YD 6/15	RF imputation P	0.6754	100	1
	YD 6/15	RF imputation NP	0.327992	100	1
	YD 6/15	RF imputation NGP	0.311338	100	1
	YD 6/15	BinSim	0.825814	100	1
