# Supplementary material for: Binary Simplification as an Effective Tool in Metabolomics Data Analysis
Source: Metabolites. 2021 Nov 18;11(11):788. doi: 10.3390/metabo11110788 (PMC8621519; doi:10.3390/metabo11110788)
Supplement: Supplementary file 1 [file metabolites-11-00788-s001.zip › Table S3.xlsx]

## Sheet: Sheet1
Table S3	Permutation tests for the supervised methods
	After 500 permutations of sample labels, the p-values of prediction accuracy of the unpermuted data is indicated
	dataset	treatment	Classifier model	p-value
	GDg2-	1/2 min imputation P	RF	0.002
	GDg2-	1/2 min imputation NP	RF	0.002
	GDg2-	1/2 min imputation NGP	RF	0.002
	GDg2-	RF imputation P	RF	0.002
	GDg2-	RF imputation NP	RF	0.002
	GDg2-	RF imputation NGP	RF	0.002
	GDg2-	BinSim	RF	0.002
	GDg2+	1/2 min imputation P	RF	0.002
	GDg2+	1/2 min imputation NP	RF	0.002
	GDg2+	1/2 min imputation NGP	RF	0.002
	GDg2+	RF imputation P	RF	0.002
	GDg2+	RF imputation NP	RF	0.002
	GDg2+	RF imputation NGP	RF	0.002
	GDg2+	BinSim	RF	0.002
	GDc2-	1/2 min imputation P	RF	0.002
	GDc2-	1/2 min imputation NP	RF	0.002
	GDc2-	1/2 min imputation NGP	RF	0.002
	GDc2-	RF imputation P	RF	0.002
	GDc2-	RF imputation NP	RF	0.002
	GDc2-	RF imputation NGP	RF	0.002
	GDc2-	BinSim	RF	0.002
	GDc2+	1/2 min imputation P	RF	0.002
	GDc2+	1/2 min imputation NP	RF	0.002
	GDc2+	1/2 min imputation NGP	RF	0.002
	GDc2+	RF imputation P	RF	0.002
	GDc2+	RF imputation NP	RF	0.002
	GDc2+	RF imputation NGP	RF	0.002
	GDc2+	BinSim	RF	0.002
	YD 2/15	1/2 min imputation P	RF	0.002
	YD 2/15	1/2 min imputation NP	RF	0.002
	YD 2/15	1/2 min imputation NGP	RF	0.002
	YD 2/15	RF imputation P	RF	0.002
	YD 2/15	RF imputation NP	RF	0.002
	YD 2/15	RF imputation NGP	RF	0.002
	YD 2/15	BinSim	RF	0.002
	YD 6/15	1/2 min imputation P	RF	0.002
	YD 6/15	1/2 min imputation NP	RF	0.002
	YD 6/15	1/2 min imputation NGP	RF	0.002
	YD 6/15	RF imputation P	RF	0.002
	YD 6/15	RF imputation NP	RF	0.002
	YD 6/15	RF imputation NGP	RF	0.002
	YD 6/15	BinSim	RF	0.002
	GD types	1/2 min imputation P	RF	0.002
	GD types	1/2 min imputation NP	RF	0.002
	GD types	1/2 min imputation NGP	RF	0.002
	GD types	RF imputation P	RF	0.004
	GD types	RF imputation NP	RF	0.002
	GD types	RF imputation NGP	RF	0.012
	GD types	BinSim	RF	0.002
	HD	1/2 min imputation P	RF	0.002
	HD	1/2 min imputation NP	RF	0.002
	HD	1/2 min imputation NGP	RF	0.002
	HD	RF imputation P	RF	0.002
	HD	RF imputation NP	RF	0.002
	HD	RF imputation NGP	RF	0.002
	HD	BinSim	RF	0.002
	GDg2-	1/2 min imputation P	PLS-DA	0.002
	GDg2-	1/2 min imputation NP	PLS-DA	0.002
	GDg2-	1/2 min imputation NGP	PLS-DA	0.002
	GDg2-	RF imputation P	PLS-DA	0.002
	GDg2-	RF imputation NP	PLS-DA	0.002
	GDg2-	RF imputation NGP	PLS-DA	0.002
	GDg2-	BinSim	PLS-DA	0.002
	GDg2+	1/2 min imputation P	PLS-DA	0.002
	GDg2+	1/2 min imputation NP	PLS-DA	0.002
	GDg2+	1/2 min imputation NGP	PLS-DA	0.002
	GDg2+	RF imputation P	PLS-DA	0.002
	GDg2+	RF imputation NP	PLS-DA	0.002
	GDg2+	RF imputation NGP	PLS-DA	0.002
	GDg2+	BinSim	PLS-DA	0.002
	GDc2-	1/2 min imputation P	PLS-DA	0.002
	GDc2-	1/2 min imputation NP	PLS-DA	0.002
	GDc2-	1/2 min imputation NGP	PLS-DA	0.002
	GDc2-	RF imputation P	PLS-DA	0.002
	GDc2-	RF imputation NP	PLS-DA	0.002
	GDc2-	RF imputation NGP	PLS-DA	0.002
	GDc2-	BinSim	PLS-DA	0.002
	GDc2+	1/2 min imputation P	PLS-DA	0.002
	GDc2+	1/2 min imputation NP	PLS-DA	0.002
	GDc2+	1/2 min imputation NGP	PLS-DA	0.002
	GDc2+	RF imputation P	PLS-DA	0.002
	GDc2+	RF imputation NP	PLS-DA	0.002
	GDc2+	RF imputation NGP	PLS-DA	0.002
	GDc2+	BinSim	PLS-DA	0.002
	YD 2/15	1/2 min imputation P	PLS-DA	0.002
	YD 2/15	1/2 min imputation NP	PLS-DA	0.002
	YD 2/15	1/2 min imputation NGP	PLS-DA	0.002
	YD 2/15	RF imputation P	PLS-DA	0.002
	YD 2/15	RF imputation NP	PLS-DA	0.002
	YD 2/15	RF imputation NGP	PLS-DA	0.002
	YD 2/15	BinSim	PLS-DA	0.002
	YD 6/15	1/2 min imputation P	PLS-DA	0.002
	YD 6/15	1/2 min imputation NP	PLS-DA	0.002
	YD 6/15	1/2 min imputation NGP	PLS-DA	0.002
	YD 6/15	RF imputation P	PLS-DA	0.002
	YD 6/15	RF imputation NP	PLS-DA	0.002
	YD 6/15	RF imputation NGP	PLS-DA	0.002
	YD 6/15	BinSim	PLS-DA	0.002
	GD types	1/2 min imputation P	PLS-DA	0.002
	GD types	1/2 min imputation NP	PLS-DA	0.002
	GD types	1/2 min imputation NGP	PLS-DA	0.002
	GD types	RF imputation P	PLS-DA	0.002
	GD types	RF imputation NP	PLS-DA	0.002
	GD types	RF imputation NGP	PLS-DA	0.002
	GD types	BinSim	PLS-DA	0.002
	HD	1/2 min imputation P	PLS-DA	0.002
	HD	1/2 min imputation NP	PLS-DA	0.002
	HD	1/2 min imputation NGP	PLS-DA	0.002
	HD	RF imputation P	PLS-DA	0.002
	HD	RF imputation NP	PLS-DA	0.002
	HD	RF imputation NGP	PLS-DA	0.002
	HD	BinSim	PLS-DA	0.002
